# Supplementary material for: A Red-Emission Fluorescent Probe with Large Stokes Shift for Detection of Viscosity in Living Cells and Tumor-Bearing Mice
Source: MDPI journal article supplement (doi:10.3390/molecules29091993), 2024-04-26
Supplement: s1 [file s1]

## Supporting Information

### **A Red-Emission Fluorescent Probe with Large Stokes Shift for Detection of Viscosity in Living Cells and Tumor-Bearing Mice**

**Beilei Wang <sup>1,2</sup>, Dezhi Yang <sup>3,\*</sup>, Xiaohong Zhong <sup>2</sup>, Yuhui Liu <sup>2</sup> and Yong Huang <sup>2,\*</sup>**

<sup>1</sup> School of Pharmaceutical Engineering, Chongqing Chemical Industry Vocational College, Chongqing 401220, China; wblei1110@163.com

<sup>2</sup> State Key Laboratory for the Chemistry and Molecular Engineering of Medicinal Resources, School of Chemistry and Pharmaceutical Science, Guangxi Normal University, Guilin 541004, China; zzh08140202@163.com (X.Z.); liuyh9611@163.com (Y.L.)

<sup>3</sup> School of Pharmacy, Zunyi Medical University, Zunyi 563000, China

\* Correspondence: lpydz@163.com (D.Y.); huangyong\_2009@163.com (Y.H.)

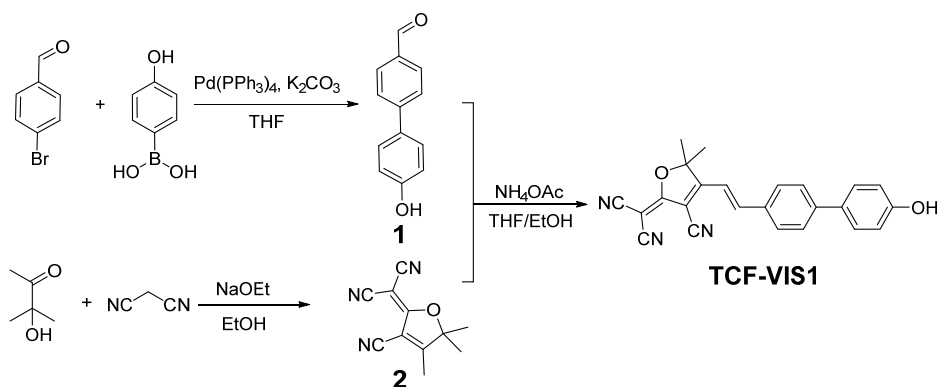

**Scheme S1.** Synthesis routes of probe TCF-VIS1.

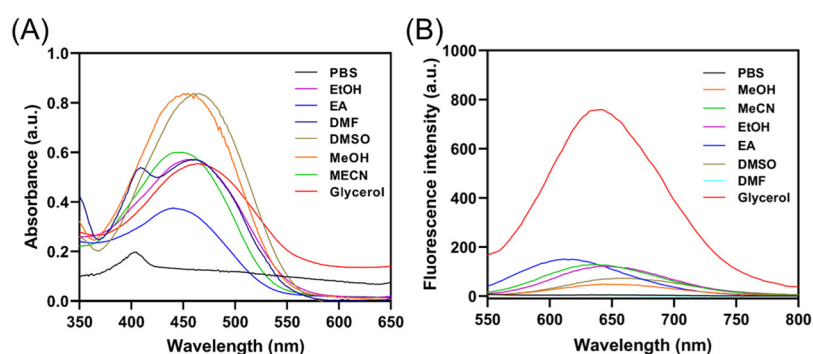

**Figure S1.** (A) Absorption spectra of TCF-VIS1 (10  $\mu$ M) in different solvents. (B) The fluorescence spectra of TCF-VIS1 (10  $\mu$ M) in different solvents ( $\lambda_{\text{ex}}$ = 460 nm)

**Table S1.** The spectroscopic properties data of probe TCF-VIS1 in different solvent.

| Solvent          | $\xi$ | $\eta^a$<br>(cp) | $\lambda_{\text{ab}}$<br>(nm) | $\lambda_{\text{em}}$<br>(nm) | Stokes shift<br>(nm) | $\Phi^b$ |
|------------------|-------|------------------|-------------------------------|-------------------------------|----------------------|----------|
| Glycerol         | 42.5  | 1150             | 460                           | 644                           | 184                  | 0.9661   |
| EtOH             | 24.3  | 1.2              | 450                           | 640                           | 190                  | 0.2679   |
| MeOH             | 33.6  | 0.59             | 455                           | 650                           | 195                  | 0.01682  |
| DMSO             | 48.9  | 2.24             | 465                           | 665                           | 200                  | 0.0440   |
| EA               | 6.02  | 0.45             | 442                           | 612                           | 170                  | 0.4261   |
| MeCN             | 37.5  | 0.37             | 443                           | 638                           | 195                  | 0.1706   |
| DMF              | 37.6  | 0.80             | 460                           | — <sup>c</sup>                | — <sup>c</sup>       | 0.0230   |
| H <sub>2</sub> O | 80.4  | 1.01             | 405                           | — <sup>c</sup>                | — <sup>c</sup>       | 0.1537   |

<sup>a</sup> Viscosity of the solvent. <sup>b</sup> Quantum yield was reported in % and measured with steady state and transient state fluorescence spectrometer.

<sup>c</sup> No fluorescence was observed.

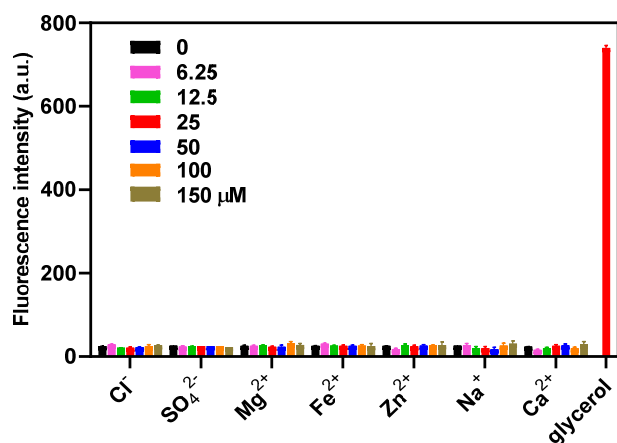

**Figure S2.** TCF-VIS1 (10  $\mu\text{M}$ ) in glycerol or PBS mixtures in the presence of different ions with varies concentrations.

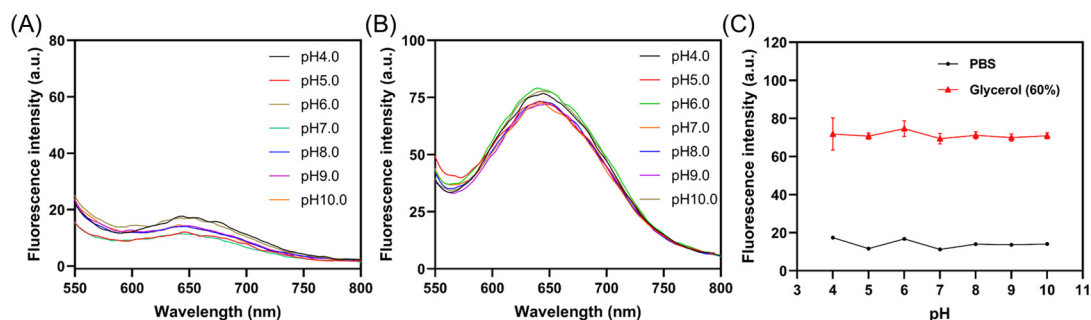

**Figure S3.** The fluorescence spectra of TCF-VIS1 (10  $\mu\text{M}$ ) in (A) PBS and (B) 60% glycerol with different pH, respectively.  $\lambda_{\text{ex}} = 460 \text{ nm}$ . (C) The effect of pH on the fluorescence emission intensity at 644 nm of TCF-VIS1 in PBS and glycerol ( $f_G = 60\%$ ).

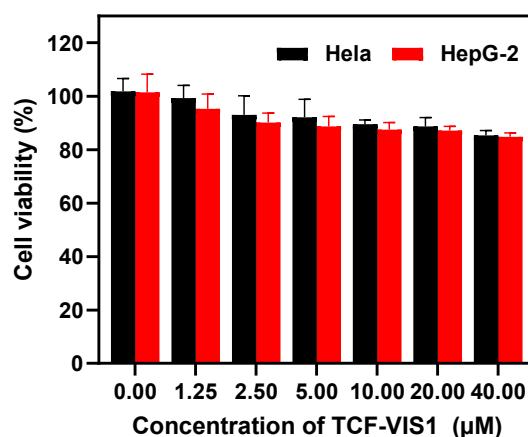

**Figure S4.** Cytotoxicity assays of TCF-VIS1 toward HeLa cells and HepG-2 cells for 24 h incubation.

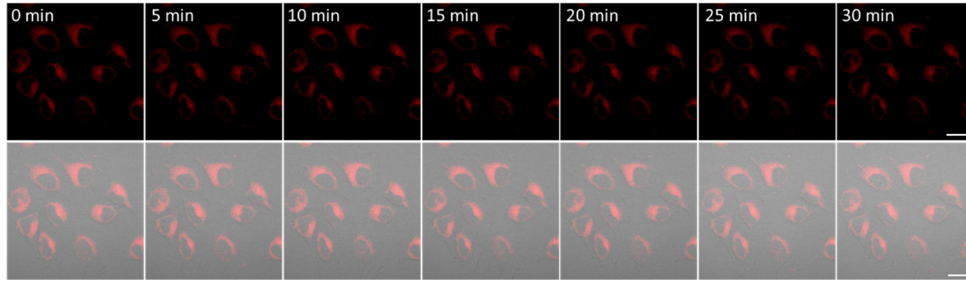

**Figure S5.** Photostability of TCF-VIS1 (10  $\mu$ M) in HeLa cells.  $\lambda_{\text{ex}} = 488$  nm,  $\lambda_{\text{em}} = 600 \sim 750$  nm. Scale bar: 20  $\mu$ m.

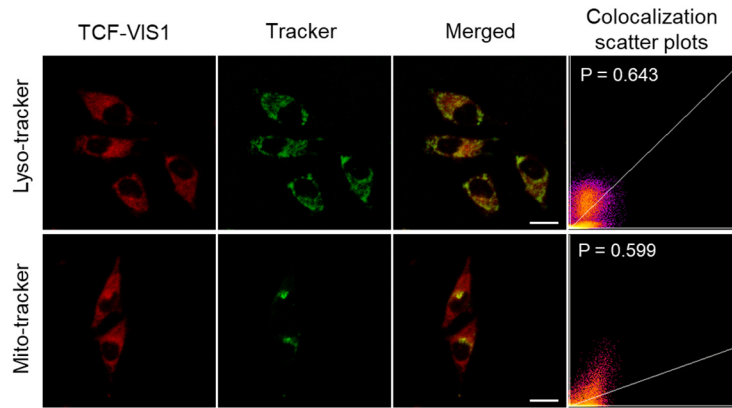

**Figure S6.** Fluorescent confocal images of HeLa cells with TCF-VIS1 and Tracker. Green Channel: fluorescence images of Mito-Tracker Green or Lyso-Tracker Green. Red Channel: fluorescence images of TCF-VIS1 ( $\lambda_{\text{ex}} = 488$  nm;  $\lambda_{\text{em}} = 600 \sim 750$  nm). Merge: the merged images of green channel and red channel. Colocalization scatter plot: the scatter plot of green channel and red channel. Scale bar: 20  $\mu$ m.

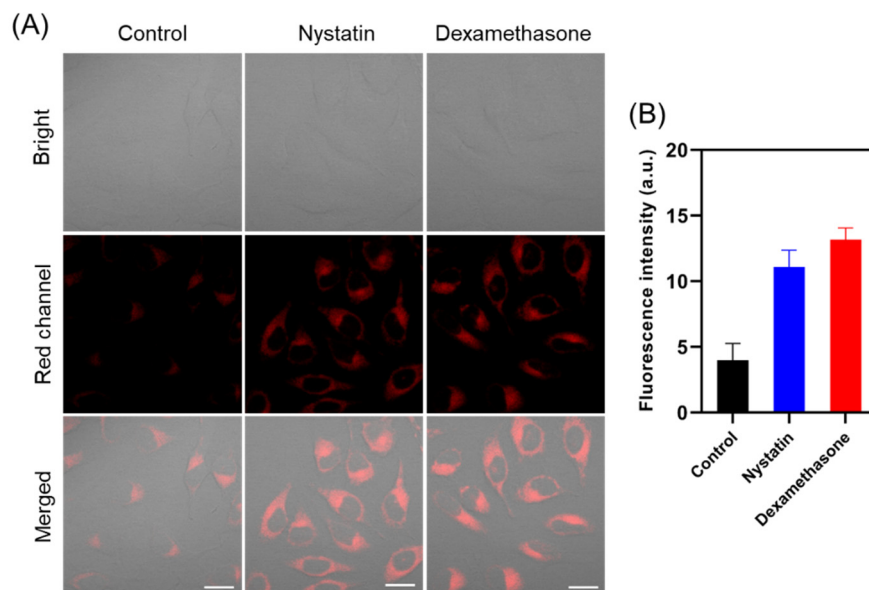

**Figure S7.** Confocal laser fluorescence images of HeLa cells: (A) HeLa cells were

incubated with TCF-VIS1 (10  $\mu$ M) for 10 min is for control; HeLa cells were incubated with nystatin (10  $\mu$ M) or dexamethasone (10  $\mu$ M) for 45 min, and then treated with TCF-VIS1 (10  $\mu$ M) for another 10 min.  $\lambda_{\text{ex}} = 488$  nm,  $\lambda_{\text{em}} = 600 \sim 750$  nm. Scale bar: 20  $\mu$ m. (B) Fluorescence intensities in panel A, which were obtained by Image J.

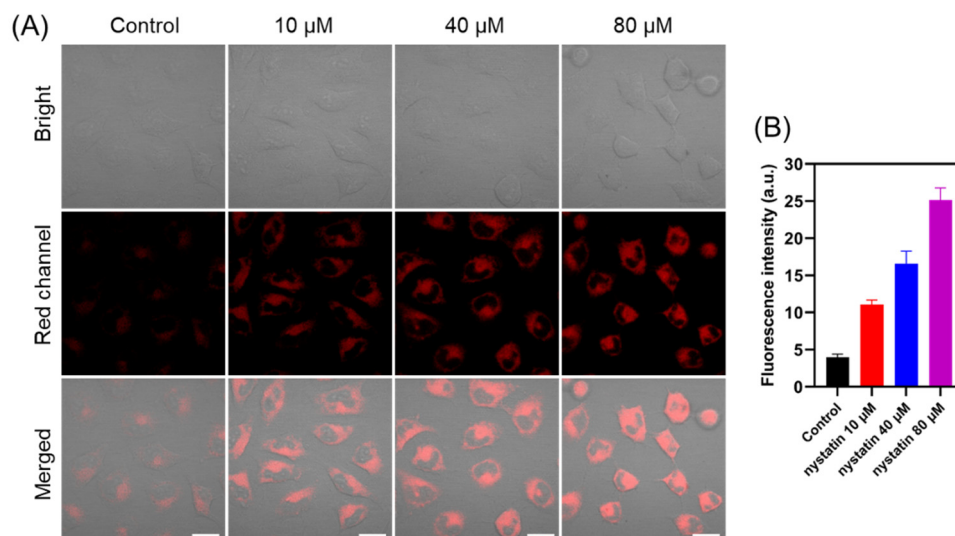

**Figure S8.** (A) CLSM images of living HepG-2 cells treated with different concentration of nystatin, then stained with TCF-VIS1 (10  $\mu$ M) for 10 min. (B) Fluorescence intensities of images obtained from (A).  $\lambda_{\text{ex}} = 488$  nm,  $\lambda_{\text{em}} = 600 \sim 750$  nm. Scale bar: 20  $\mu$ m.

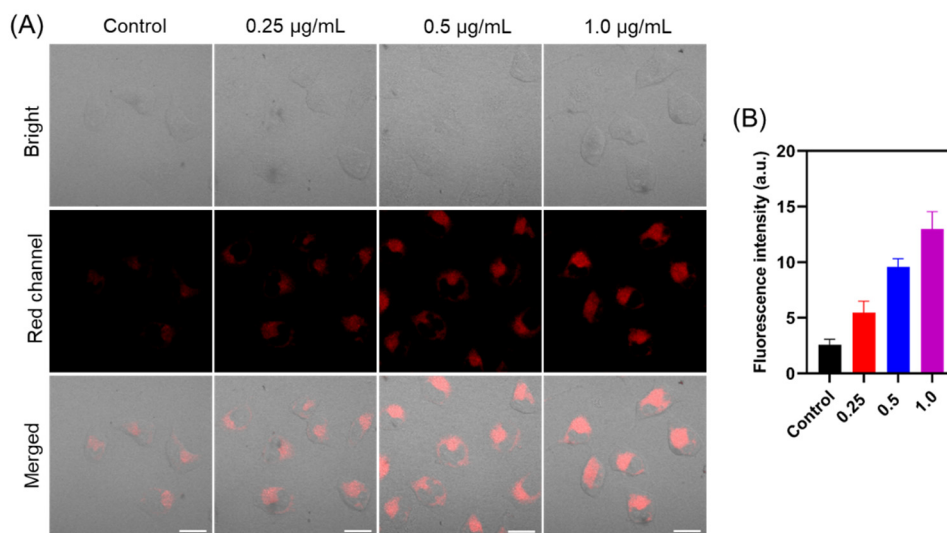

**Figure S9.** (A) CLSM images of living HepG-2 cells treated with different concentration of LPS, then stained with TCF-VIS1 (10  $\mu$ M). (B) Fluorescence intensities of images obtained from (A).  $\lambda_{\text{ex}} = 488$  nm,  $\lambda_{\text{em}} = 600 \sim 750$  nm. Scale bar: 20  $\mu$ m.

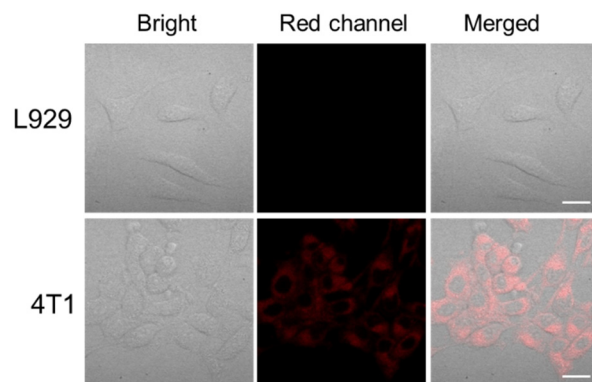

**Figure S10.** Fluorescence images of L929 cells and 4T1 cells treated with TCF-VIS1 (10  $\mu$ M), respectively. Scale bar: 20  $\mu$ m. ( $\lambda_{\text{ex}}$  = 488 nm;  $\lambda_{\text{em}}$  = 600 ~ 750 nm).

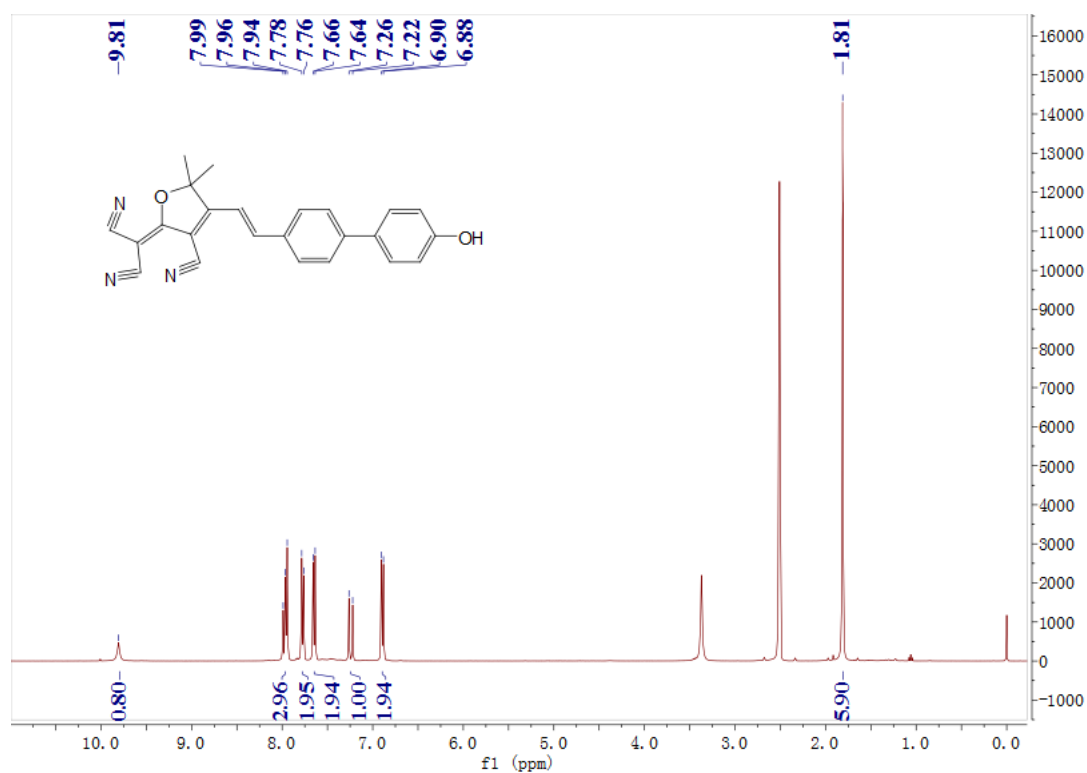

**Figure S11.**  $^1\text{H}$  NMR (400 MHz,  $\text{DMSO}-d_6$ ) spectrum of TCF-VIS1.

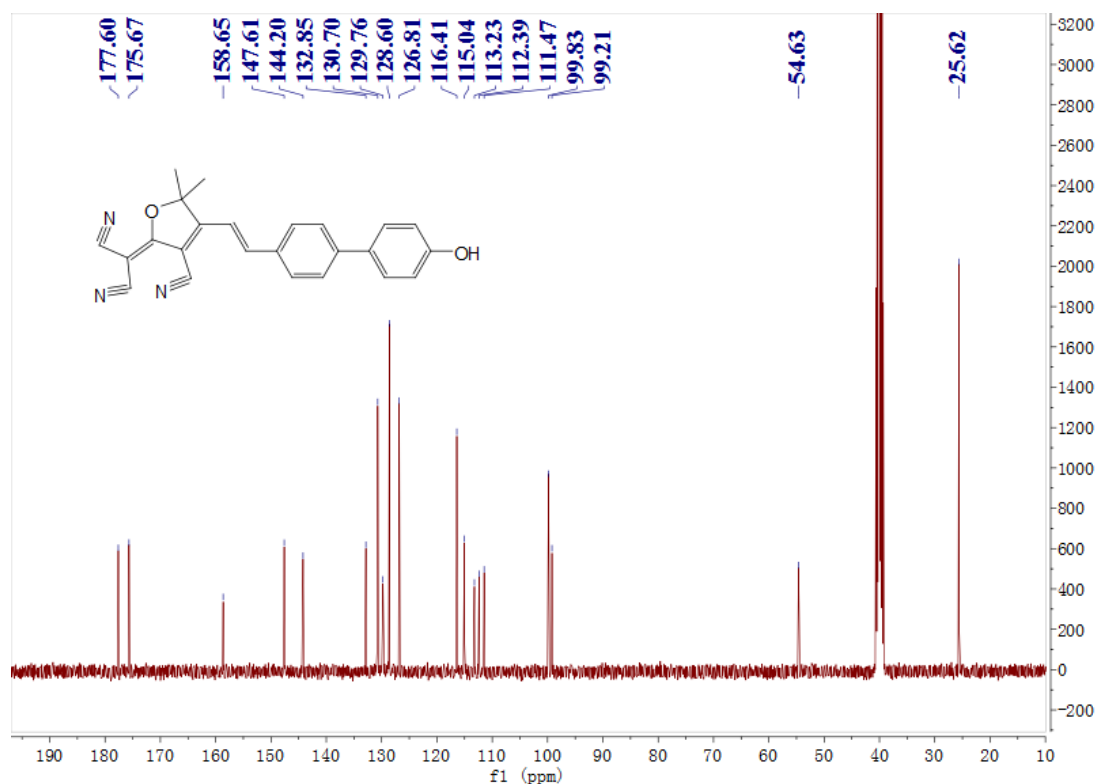

**Figure S12.** <sup>13</sup>C NMR (101 MHz, DMSO-*d*<sub>6</sub>) spectrum of TCF-VIS1.

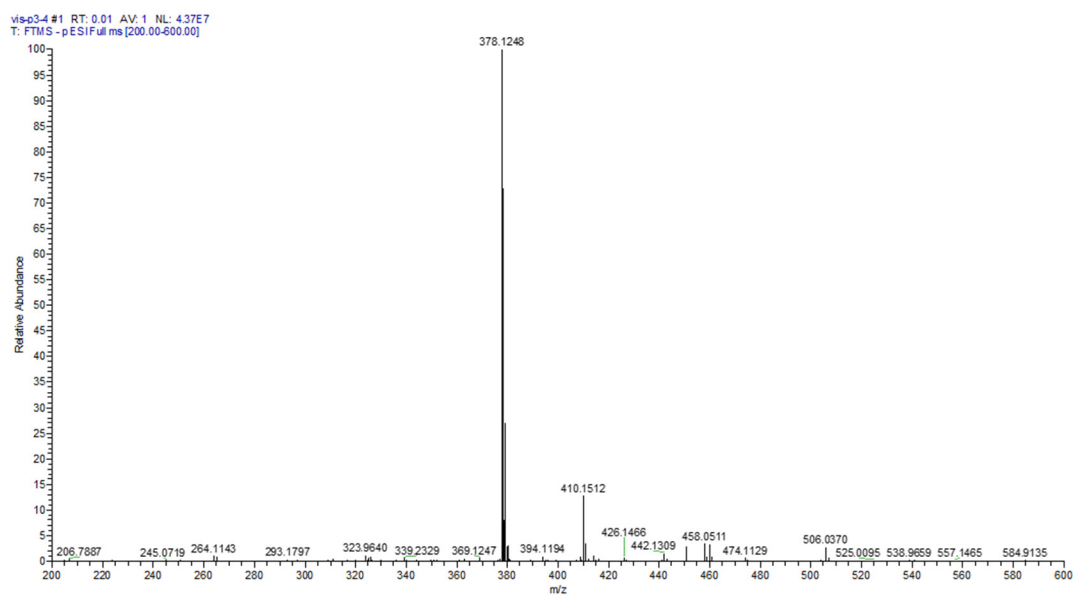

**Figure S13.** HRMS analysis of the reaction solution of TCF-VIS1.

**Table S2.** Previous viscosity probes and this work

| Probes                                                                              | $\lambda_{\text{ex}}/\text{nm}$ | $\lambda_{\text{em}}/\text{nm}$ | Stokes shift/nm | Sensitivity | Response multiple | Bioimaging application               | Ref. |
|-------------------------------------------------------------------------------------|---------------------------------|---------------------------------|-----------------|-------------|-------------------|--------------------------------------|------|
| 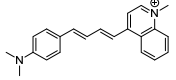   | 560                             | 670                             | 110             | 0.958       | 167-folds         | Cell,<br>Zebrafish,<br>Liver tissues | 1    |
|    | 617                             | 650                             | 33              | 0.71        | 16.2-folds        | Cell                                 | 2    |
|    | 461                             | 624                             | 163             | 0.419       | 7.5-folds         | Cell and mice                        | 3    |
|    | 470                             | 650                             | 180             | 0.678       | 92-folds          | Cell                                 | 4    |
|   | 582                             | 720                             | 138             | 0.725       | 157-folds         | Cell and mice                        | 5    |
|  | 520                             | 696                             | 176             | 0.549       | 30-folds          | Blood vessel,<br>Mice                | 6    |
|  | 610                             | 734                             | 124             | 0.933       | 175-folds         | Cells                                | 7    |
|  | 510                             | 675                             | 165             | 2.3         | 400-folds         | Cells,<br>Zebra fishes               | 8    |
|  | 525                             | 583                             | 58              | 0.58        | 66-folds          | Cell                                 | 9    |
|  | 350                             | 400                             | 50              | 0.97        | 28.6-folds        | Cells,<br>Zebra fishes               | 10   |
| This work                                                                           | 460                             | 644                             | 184             | 0.924       | 78-folds          | Cell and mice                        |      |



## References

1. Zhang Y, Li Z, Hu W, Liu Z. A mitochondrial-targeting near-infrared fluorescent probe for visualizing and monitoring viscosity in live cells and tissues. *Anal Chem.* **2019**, 91, 10302-10309.
2. Wei YF, Weng XF, Sha XL, Sun R, Xu YJ, Ge JF. Simultaneous imaging of lysosomal and mitochondrial viscosity under different conditions using a NIR probe. *Sensor. Actuat. B. Chem.* **2021**, 326, 128954.
3. Liu Y, Ma Y, Gao W, Ma S, Lin W. Construction of a fluorescent probe with large stokes shift and deep red emission for sensing of the viscosity in hyperglycemic mice. *Dyes Pigments.* **2021**, 195, 109674.
4. Wang X, Fan L, Wang S, Zhang Y, Li F, Zan Q, Lu W, Shuang S, Dong C. Real-time monitoring mitochondrial viscosity during mitophagy using a mitochondria-immobilized near-infrared aggregation-induced emission probe. *Anal Chem.* **2021**, 93, 3241-3249.
5. Fan L, Zan Q, Wang X, Yu X, Wang S, Zhang Y, Yang Q, Lu W, Shuang S, Dong C. A mitochondria-targeted and viscosity-sensitive near-infrared fluorescent probe for visualization of fatty liver, inflammation and photodynamic cancer therapy. *Chem. Eng. J.* **2022**, 449, 137762.
6. Yin J, Kong X, Lin W. Noninvasive cancer diagnosis *in vivo* based on a viscosity-activated near-infrared fluorescent probe. *Anal Chem.* **2021**, 93, 2072-2081.
7. Zhang S, Zhang Y, Zhao L, Xu L, Han H, Huang Y, Fei Q, Sun Y, Ma P, Song D. A novel water-soluble near-infrared fluorescent probe for monitoring mitochondrial viscosity. *Talanta.* **2021**, 233, 122592.
8. Fu M, Shen W, Chen Y, Yi W, Cai C, Zhu L, Zhu Q. A highly sensitive red-emitting probe for the detection of viscosity changes in living cells, zebrafish, and human blood samples. *J. Mater. Chem. B.* **2020**, 8, 1310-1315.
9. Chen B, Li C, Zhang J, Kan J, Jiang T, Zhou J, Ma H. Sensing and imaging of mitochondrial viscosity in living cells using a red fluorescent probe with a long lifetime. *Chem. Commun.* **2019**, 55, 7410-7413.
10. Du W, Gu Y, Zhou X, Wang Z, Wang S. Rational design and comparison of three curcumin-based fluorescent probes for viscosity detection in living cells and zebrafish. *Analyst.* **2024**, 149, 789-799.
